# Supplementary material for: Orthotopic T-cell receptor replacement in primary human T cells using CRISPR-Cas9-mediated homology-directed repair
Source: PubMed Central journal article supplement — STAR Protoc. 2021 Dec 14;3(1):101031. doi: 10.1016/j.xpro.2021.101031 (PMC8683654; doi:10.1016/j.xpro.2021.101031), 2021-12-14
Supplement: mmc1.pdf [file mmc1.pdf]

**Table S1: HDR DNA template sequence (TCR 6-2), Related to Before you begin Step 1**

|                                                |                                                                                                                                                                                                                                                                                                                                                                                                                                                                                                                                                                                                                                                                                                                                                                                                                                                                                                                                                                                             |
|------------------------------------------------|---------------------------------------------------------------------------------------------------------------------------------------------------------------------------------------------------------------------------------------------------------------------------------------------------------------------------------------------------------------------------------------------------------------------------------------------------------------------------------------------------------------------------------------------------------------------------------------------------------------------------------------------------------------------------------------------------------------------------------------------------------------------------------------------------------------------------------------------------------------------------------------------------------------------------------------------------------------------------------------------|
| TRAC LHA                                       | CTGCCTTTACTCTGCCAGAGTTATATTGCTGGGGTTTTGAAGAAGATCCTATTAATAAAAAGAATAAGCA<br>GTATTATTAAGTAGCCCTGCATTTTCAGGTTTCCTTGAGTGGCAGGCCAGGCCTGGCCGTGAACGTTCA<br>CTGAAATCATGGCCTCTTGCCAAAGATTGATAGCTTGTGCCTGTCCCTGAGTCCCAGTCCATCACGAG<br>CAGCTGGTTTCTAAGATGCTATTTCCCGTATAAAGCATGAGACCGTGACTTGCCAGCCCCACAGAGCC<br>CCGCCCTTGTCCATCACTGGCATCTGGACTCCAGCCTGGGTTGGGGCAAAGAGGGAAATGAGATCAT<br>GTCCTAACCCCTGATCCTCTTGTCCACAGATATCCAGAACCCTGACCCTGCCGTG                                                                                                                                                                                                                                                                                                                                                                                                                                                                                                                                                           |
| P2A                                            | GGCAGCGGCGCCACCAACTTCAGCCTGCTGAAGCAGGCCGGCGACGTGGAAGAGAACCCTGGGCC                                                                                                                                                                                                                                                                                                                                                                                                                                                                                                                                                                                                                                                                                                                                                                                                                                                                                                                           |
| TCR 6-2<br>β-chain<br>(VDJβ with<br>mTRBC-Cys) | ATGGGCTCCTGGACCCTCTGCTGTGTGTCCCTTGCATCCTGGTAGCAAAGCACACAGATGCTGGAGT<br>TATCCAGTACCCCCGGCAGGAGGTGACAGAGATGGGACAAGAAGTGAAGTCTGAGATGTAAACCAATTT<br>CAGGACACGACTACCTTTTCTGGTACAGACAGACCATGATGCGGGGACTGGAGTTGCTCATTTACTTT<br>AACAAACAACGTTCCGATAGATGATTCAGGGATGCCCGAGGATCGATTCTCAGCTAAGATGCCTAATGC<br>ATCATTCTCCACTCTGAAGATCCAGCCCTCAGAACCAGGGACTCAGCTGTGTACTTCTGTGCCAGCA<br>GTTCCGCTAACTATGGCTACACCTTCGGTTCTGGGACCAAGTTAACCGTTGTAGAGGATCTGAGAAAT<br>GTGACTCCACCCAAGGTCCTTGTGGTGGCCATCAAAGCAGAGATTGCAAACAAAACAAAGGCTAC<br>CCTCGTGTGCTTGGCCAGGGGCTTCTTCCCTGACCACGTGGAGCTGAGCTGGTGGGTGAATGGCAAG<br>GAGGTCCACAGTGGGGTCTGCACGGACCCTCAGGCCTACAAGGAGAGCAATTATAGCTACTGCCTGA<br>GCAGCCGCTGAGGGTCTCTGCTACCTTCTGGCACAATCCTCGAAACCCTTCCGCTGCCAAAGTGA<br>GTTCCATGGGCTTTCAGAGGAGGACAAGTGGCCAGAGGGCTCACCCAAACCTGTACACAGAACATC<br>AGTGCAGAGGCCTGGGGCCGAGCAGACTGTGGAATCACTTCAGCATCCTATCATCAGGGGGTTCTGT<br>CTGCAACCATCCTCTATGAGATCCTACTGGGGAGGCCACCCTATATGCTGTGCTGGTCAAGTGGCCTG<br>TGCTGATGGCCATGGTCAAGAAAAAATTCC |
| T2A                                            | GGCAGCGGCGAGGGCAGAGGAAGTCTGCTAACATGCGGTGACGTGAGGAGAATCCTGGACCT                                                                                                                                                                                                                                                                                                                                                                                                                                                                                                                                                                                                                                                                                                                                                                                                                                                                                                                              |
| TCR 6-2<br>α-chain<br>(VJa with<br>mTRAC-Cys)  | ATGCTCCTTGAACATTTATTAATAATCTTGTGGATGCAGCTGACATGGGTCAAGTCAACAGTGAAT<br>CAGAGTCCCTCAATCTATGTTTATCCAGGAAGGAGAAGATGCTCCATGAACTGCACTTCTTCAAGCATA<br>TTAACACCTGGCTATGGTACAAGCAGGACCCTGGGGAAGGTCCTGTCCTTTGATAGCCTTATATAA<br>GGCTGGTGAATTGACCTCAAATGGAAGACTGACTGCTCAGTTTGGTATAACCAGAAAAGGACAGCTTCC<br>TGAATATCTCAGCATCCATACCTAGTGTAGGCATCTACTTCTGTGCTGGGCCGATGAAAACCTCCT<br>ACGACAAGGTGATATTTGGGCCAGGGACAAGCTTATCAGTCATTCCAAATATCCAGAACCAGAACCT<br>GCTGTGTACCAGTTAAAAGATCCTCGGTCTCAGGACAGCACCCCTCTGCCTGTTCCACCGACTTTGACTC<br>CCAAATCAATGTGCCGAAAACCATGGAATCTGGAACGTTTCATCACTGACAAATGCGTGTGCTGGACATGA<br>AAGCTATGGATTCCAAGAGCAATGGGGCCATTGCTGGAGCAACCAGACAAGCTTACCTGCCAAGAT<br>ATCTTCAAAGAGACCAACGCCACCTACCCAGTTTCAGACGTTCCCTGTGATGCCACGTTGACTGAGAA<br>AAGCTTTGAAACAGATATGAACCTAACTTTCAAACCTGTCAGTTATGGGACTCCGAATCCTCCTGCT<br>GAAAGTAGCCGGATTTAACCTGCTCATGACGCTGAGGCTGTGGTCCAGT                                                                                                                      |
| stop                                           | TGA                                                                                                                                                                                                                                                                                                                                                                                                                                                                                                                                                                                                                                                                                                                                                                                                                                                                                                                                                                                         |
| Poly A (bGHpA)                                 | CTAGAGCTCGCTGATCAGCCTCGACTGTGCCTTCTAGTTGCCAGCCATCTGTTGTTTGGCCCTCCCC<br>GTGCCCTTCTTGACCCTGGAAGGTGCCACTCCCCTGTCCTTTCCTAATAAAATGAGGAAATTGCATCG<br>CATTGTCTGAGTAGGTGTCAATTCTATTCTGGGGGGTGGGGTGGGGCAGGACAGCAAGGGGGAGGATT<br>GGGAAGAGAATAGCAGGCATGCTGGGGA                                                                                                                                                                                                                                                                                                                                                                                                                                                                                                                                                                                                                                                                                                                                         |
| TRAC RHA                                       | TACCAGCTGAGAGACTCTAAATCCAGTGACAAGTCTGTCTGCCTATTCACCGATTTTGATTCTCAAACA<br>AATGTGTCAAAAGTAAGGATTTCTGATGTGTATATCACAGACAAAACCTGTGCTAGACATGAGGTCTATG<br>GACTTCAAGAGCAACAGTGTGTGGCCTGGAGCAACAATCTGACTTTGCATGTGCAAACGCCTTCAA<br>CAACAGCATTATTCCAGAAGACACCTTCTTCCCCAGCCCAGGTAAGGGCAGCTTTGGTGCCTTCGAG<br>GCTGTTTCTTGTTCAGGAATGGCCAGGTTCTGCCAGAGCTCTGGTCAATGATG                                                                                                                                                                                                                                                                                                                                                                                                                                                                                                                                                                                                                                       |
